# Supplementary material for: Potential of Hydroxybenzoic Acids From Graptopetalum paraguayense for Inhibiting of Herpes Simplex Virus DNA Polymerase – Metabolome Profiling, Molecular Docking and Quantum-chemical Analysis
Source: Preprints.org preprint supplement (doi:10.20944/preprints202111.0568.v2), 2021-12-15
Supplement: Supplementary file 1 [file supplementary]

**SUPPLEMENTARY MATERIALS**

**Potential of hydroxybenzoic acids fraction from *Graptopetalum paraguayense* E. Walter leaves for inhibiting Herpes Simplex virus DNA polymerase – metabolome** **profiling, molecular docking and quantum-chemical analysis**

*Nadezhda Todorova1, Miroslav Rangelov 2, Ivayla Dincheva3, Ilian Badjakov3, Venelin Enchev4, Nadezhda Markova2**

1 Institute of Biodiversity and Ecosystem Research, Bulgarian Academy of Sciences, 1113 Sofia, Bulgaria, [nadeshda@abv.bg](mailto:nadeshda@abv.bg)

2 Institute of Organic Chemistry with Centre of Phytochemistry, Bulgarian Academy of Sciences, 1113 Sofia, Bulgaria, [nadya@orgchm.bas.bg](mailto:nadya@orgchm.bas.bg), [marangelov@gmail.com](mailto:marangelov@gmail.com)

3 Department of Agrobiotechnologies, Agrobioinstitute, Agricultural Academy, 1164 Sofia, Bulgaria, [ivadincheva@yahoo.com](mailto:ivadincheva@yahoo.com), [ibadjakov@gmail.com](mailto:ibadjakov@gmail.com)

4 Institute of General and Inorganic Chemistry, Bulgarian Academy of Sciences, 1113 Sofia, Bulgaria, [venelin@svr.igic.bas.bg](mailto:venelin@svr.igic.bas.bg)

**Table S1.** Polar metabolites fraction from *G. Paraguayense* determined by GC-MS analysis.

| # | **#** | **Name** | **RT** | **RIlit** | **RIcalc** | **µg/g DW** |
| --- | --- | --- | --- | --- | --- | --- |
| **Amino acids** | | | | | | |
| Essential amino acids | | | | | | |
| 1 | 1 | L-Valine (2TMS) | 4.89 | 1223.5 | 1223.7 | 67.25 |
| 2 | 2 | L-Leucine (2TMS) | 5.45 | 1280.9 | 1281.1 | 92.04 |
| 3 | 3 | L-Isoleucine (2TMS) | 5.67 | 1302.6 | 1302.8 | 80.74 |
| 5 | 5 | L-Threonine (3TMS) | 6.59 | 1395.7 | 1395.9 | 38.61 |
| 4 | 4 | L-Methionine (2TMS) | 7.77 | 1523.1 | 1523.2 | 25.78 |
| 6 | 6 | L-Phenylalanine (2TMS) | 8.93 | 1636.4 | 1636.6 | 82.72 |
| Non-essential amino acids | | | | | | |
| 7 | 1 | L-Alanine (2TMS) | 4.55 | 1102.3 | 1102.5 | 29.06 |
| 8 | 2 | L-Proline (2TMS) | 5.72 | 1305.6 | 1305.8 | 33.28 |
| 9 | 3 | L-Glycine (3TMS) | 5.81 | 1311.1 | 1311.3 | 34.89 |
| 10 | 4 | L-Serine (3TMS) | 6.33 | 1370.6 | 1370.8 | 26.93 |
| 11 | 5 | 4-Aminobutyric acid (3TMS); [GABA]; non-protein amino acid | 7.86 | 1533.6 | 1533.7 | 27.24 |
| 12 | 6 | L-Tyrosine (3TMS) | 13.18 | 1942.2 | 1942.4 | 37.75 |
| Total amino acids | | | | | | 576.30 |
| **Organic and inorganic acids** | | | | | | |
| 13 | 1 | Phosphoric acid (3TMS) | 5.50 | 1277.0 | 1277.1 | 25.40 |
| 14 | 1 | Succinic acid (2TMS) | 5.85 | 1314.5 | 1322.6 | 26.97 |
| 15 | 2 | Fumaric acid (2TMS) | 6.15 | 1358.4 | 1358.5 | 25.05 |
| 16 | 3 | Malic acid (3TMS) | 7.48 | 1488.3 | 1488.4 | 1830.54 |
| 17 | 4 | Citric acid (4TMS) | 11.52 | 1821.6 | 1821.7 | 110.94 |
| Total organic acids | | | | | | 2018.90 |
| **Mono- and dicarbohydrates** | | | | | | |
| 18 | 1 | D-Ribose methoxyamine (4TMS) isomer | 9.46 | 1666.1 | 1666.2 | 160.25 |
| 19 | 2 | D-Ribose methoxyamine (4TMS) isomer | 9.65 | 1681.9 | 1682.0 | 52.42 |
| 20 | 3 | D-Fructose methoxyamine (5TMS) isomer | 12.43 | 1871.1 | 1871.2 | 609.90 |
| 21 | 4 | D-Fructose methoxyamine (5TMS) isomer | 12.58 | 1877.8 | 1885.9 | 515.45 |
| 22 | 5 | D-Galactose methoxyamine (5TMS) isomer | 12.72 | 1885.5 | 1885.6 | 347.01 |
| 23 | 6 | D-Mannose methoxyamine (5TMS) | 12.82 | 1894.9 | 1895.0 | 1335.38 |
| 24 | 7 | D-Galactose methoxyamine (5TMS) isomer | 13.04 | 1906.1 | 1906.2 | 82.42 |
| 25 | 8 | D-Glucose methoxyamine (5TMS) | 13.09 | 1914.4 | 1914.5 | 200.05 |
| 26 | 9 | Sedoheptulose methoxyamine (6TMS) isomer | 16.63 | 2150.1 | 2150.2 | 803.77 |
| 27 | 10 | Sedoheptulose methoxyamine (6TMS) isomer | 16.72 | 2156.2 | 2156.3 | 646.86 |
| 28 | 11 | Sucrose (8TMS); [alpha-D-Glc-(1,2)-beta-D-Fru (8TMS)] | 24.62 | 2640.2 | 2640.4 | 473.52 |
| 29 | 12 | Maltose (8TMS); [alpha-D-Glc-(1,4)-D-Glc (8TMS)] | 25.39 | 2741.6 | 2741.8 | 34.88 |
| **Total mono- and dicarbohydrates** | | | | | | 5261.90 |
| Sugar alcohols | | | | | | |
| 30 | 1 | Glycerol (3TMS) | 5.47 | 1284.3 | 1284.4 | 329.58 |
| 31 | 2 | D-Threitol (4TMS) | 7.63 | 1498.6 | 1498.7 | 23.94 |
| 32 | 3 | D-Erythritol (4TMS) | 7.71 | 1510.4 | 1510.5 | 32.39 |
| 33 | 4 | myo-Inositol (6TMS) | 15.81 | 2091.3 | 2091.4 | 37.59 |
| Total sugar alcohols | | | | | | 423.50 |

**Table S2.** Main saturated fatty acids fraction from *G. Paraguayense* determined by GC-MS analysis.

| **#** | **Name** | **Simplified abbreviation** | **RT** | **RIlit** | **RIcalc** | **µg/g DW** |
| --- | --- | --- | --- | --- | --- | --- |
| **Fatty acids** | | | | | | |
| 1 | *n*-Tetradecanoic acid methyl ester; [Myristic acid] | 14:0 | 9.77 | 1694.1 | 1694.2 | 95.97 |
| 2 | *n*-Hexadecenoic acid methyl ester; [Palmitoleic acid]; ω-7 | 16:1 n-7 | 10.56 | 1884.9 | 1885.0 | 89.12 |
| 3 | *n*-Hexadecanoic acid methyl ester; [Palmitic acid] | 16:0 | 12.74 | 1907.9 | 1908.0 | 432.87 |
| 4 | all *cis*-9,12-Octadecadienoic acid methyl ester; [Linoleic acid]; ω-6 | 8:2 n-6 | 15.34 | 2071.9 | 2072.0 | 2522.25 |
| 5 | *cis*-Octadecenoic acid methyl ester; [Oleic acid]; ω-9 | 18:1 | 15.44 | 2077.3 | 2077.4 | 459.56 |
| 6 | all *cis*-9,12,15-Octadecatrienoic acid methyl ester; [α-Linolenic acid]; ω-3 | 8:3 n-3 | 15.45 | 2078.3 | 2078.4 | 2842.50 |
| 7 | *n*-Octadecanoic acid methyl ester; [Stearic acid] | 18:0 | 15.95 | 2111.1 | 2111.2 | 122.24 |
| 8 | *cis*-11-E-Eicosenoic acid methyl ester | 20:1 n-9 | 24.06 | 2289.8 | 2289.9 | 173.73 |
| 9 | *n*-Eicosanoic acid methyl ester; [Arachidic acid] | 20:0 | 24.85 | 2302.6 | 2302.7 | 93.76 |
| 10 | *n*-Docosanoic acid methyl ester; [Behenic acid ] | 22:0 | 27.51 | 2475.2 | 2475.3 | 119.56 |
| Total fatty acids | | | | | | 6951.55 |

**Table 3S.** Sterol fraction from *G. Paraguayense* determined by GC-MS analysis.

| **#** | **Name** | **RT** | **RIlit** | **RIcalc** | **µg/g DW** |
| --- | --- | --- | --- | --- | --- |
| **Sterols, terpenoids and tocopherols** | | | | | |
| 1 | *γ*-Tocopherol (TMS) | 20.72 | 2999.6 | 2999.7 | 97.80 |
| 2 | *α*-Tocopherol (TMS) | 30.52 | 3142.7 | 3142.8 | 1447.18 |
| 3 | Campesterol (TMS) | 31.92 | 3263.1 | 3263.2 | 625.33 |
| 4 | Stigmasterol (TMS) | 32.28 | 3286.3 | 3286.4 | 707.60 |
| 5 | *β*-Sitosterol (TMS) | 32.99 | 3375.4 | 3375.5 | 2010.41 |
| 6 | *β*-Amyrin (TMS) | 33.12 | 3385.2 | 3385.3 | 2080.86 |
| 7 | A'-Neogammacer-22(29)-en-3-one; Hopenone b | 33.31 | 3394.7 | 3394.8 | 488.10 |
| 8 | Lanosterol (TMS) | 33.48 | 3401.3 | 3401.4 | 537.06 |
| 9 | A'-Neogammacer-22(29)-ene; Hopene b | 33.72 | 3429.9 | 3430.0 | 664.40 |
| Total sterols | | | | | 8658.75 |

**DW**- dried weight, **RT**-retention time, **RI**-Kovats retention indices, **TMS**-trimethylsilyl derivatives


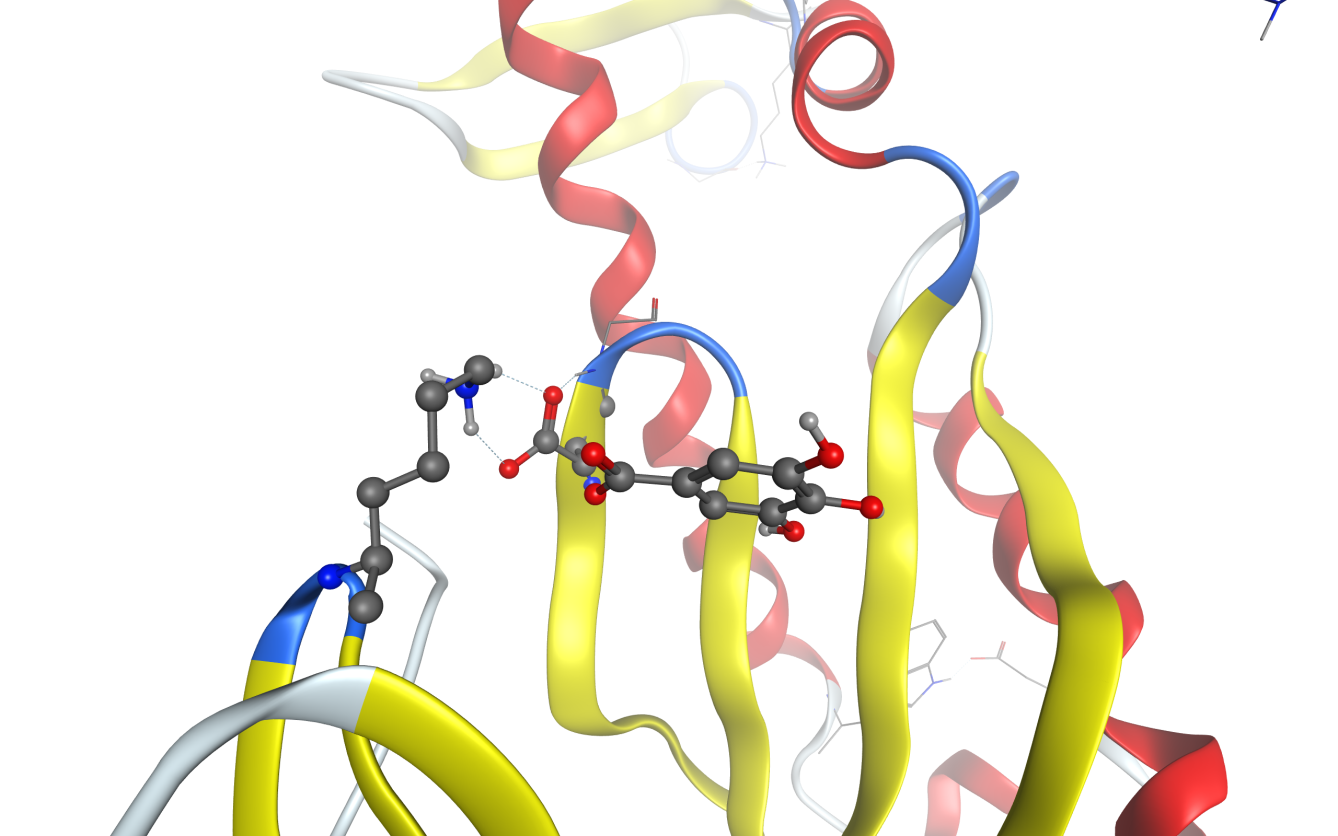


Figure S1. Gallic acid and its vicinity after docking procedure.


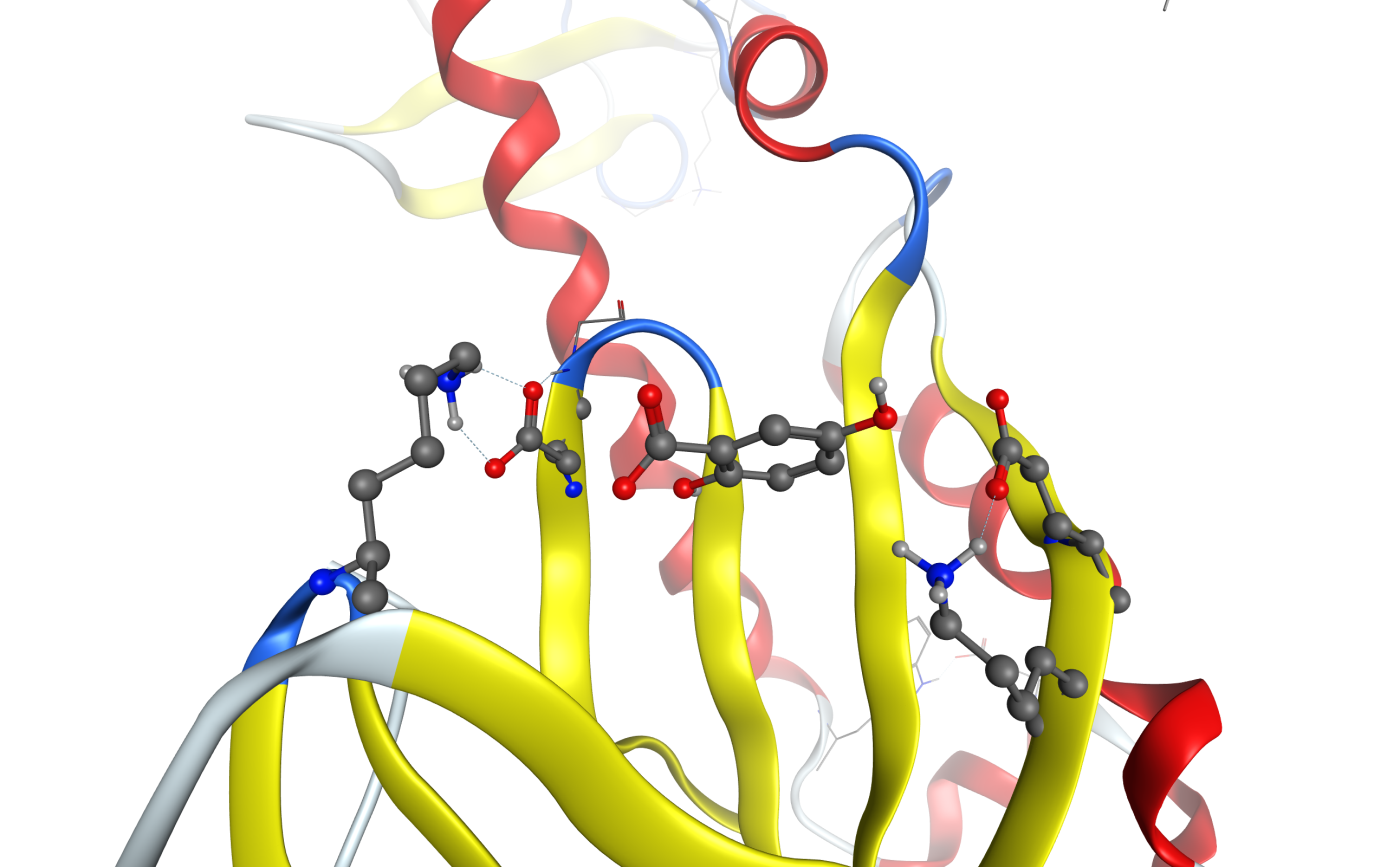


Figure S2. Gentisic acid and its vicinity after docking procedure.


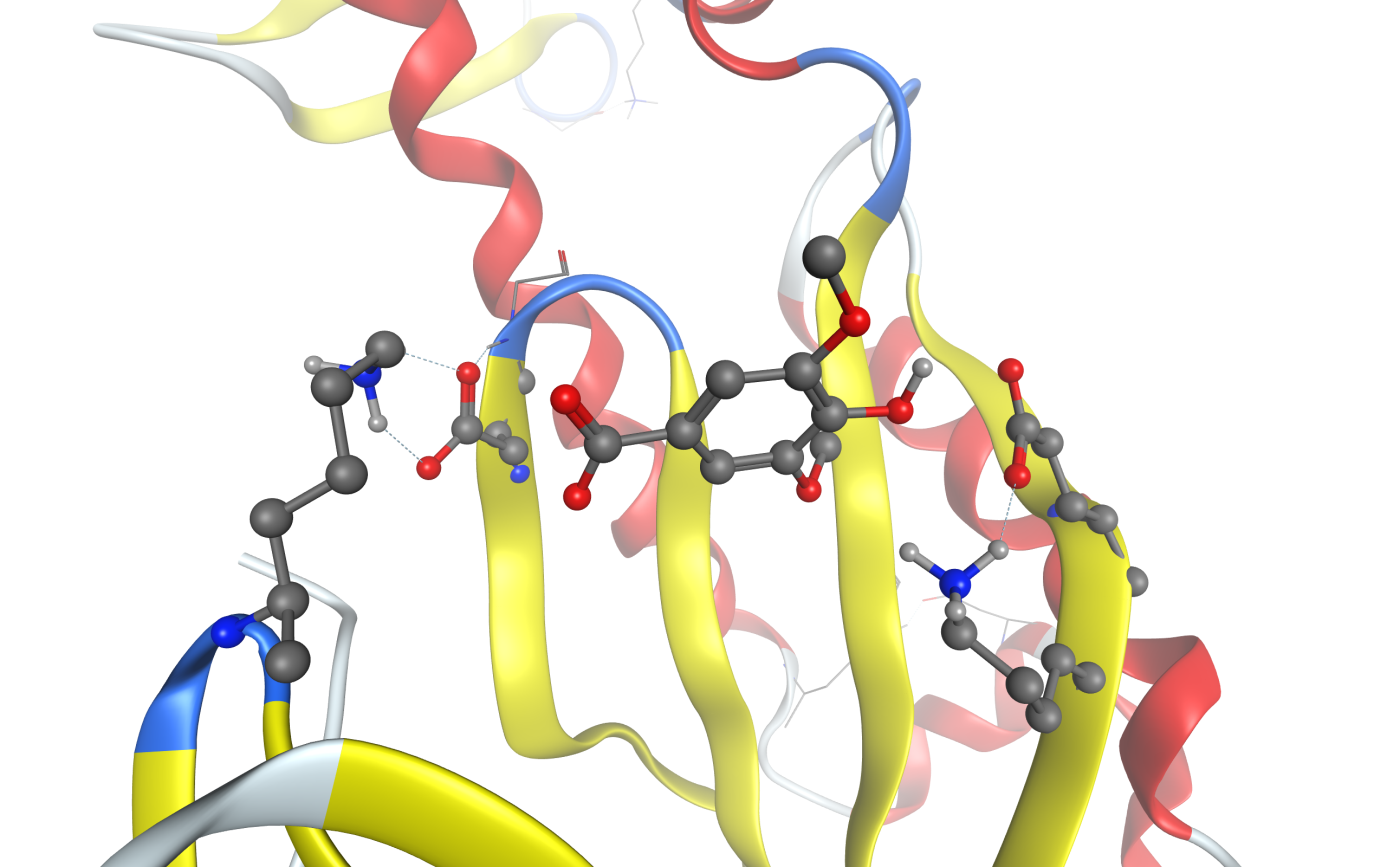


Figure S3. Syringic acid and its vicinity after docking procedure.


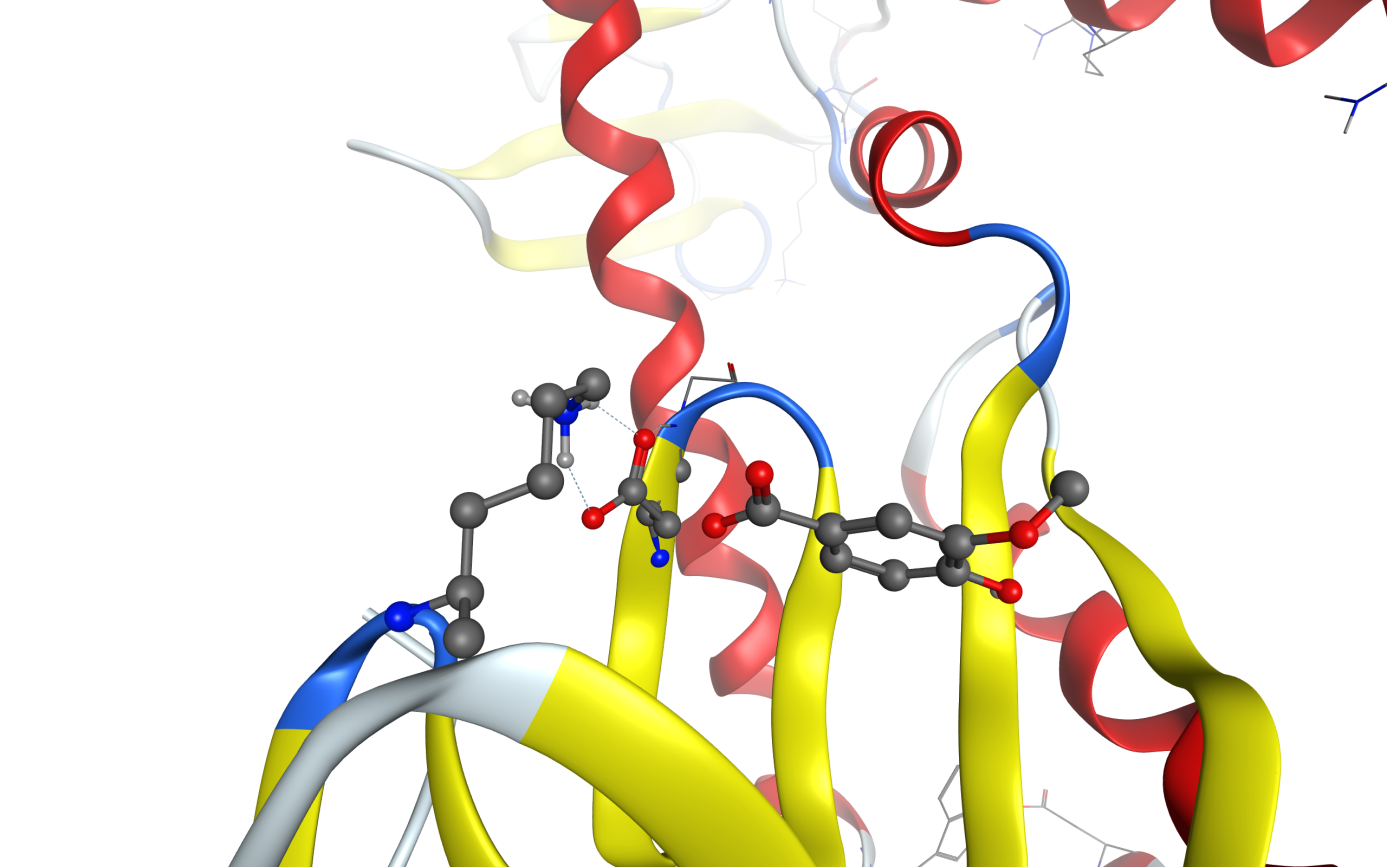


Figure S4. Vanillic acid and its vicinity after docking procedure.
